# Supplementary material for: Digital Trade and Corporate Greenwashing: Evidence from China’s Cross-Border E-Commerce Comprehensive Pilot Zones
Source: Research Square preprint supplement (doi:10.21203/rs.3.rs-8206132/v1), 2026-01-19
Supplement: Supplementary file 1 [file c3464de66a4482cc5f991eed.docx]

# Appendix A

The list of the seven batches of Cross-border E-commerce Comprehensive Pilot Zones approved by the State Council of China.

**Table 1. The lists of pilot zones**

| **Date** | **City** |
| --- | --- |
| March 7, 2015 | Hangzhou |
| January 6, 2016 | Tianjin, Shanghai, Chongqing, Hefei, Zhengzhou, Guangzhou, Chengdu, Dalian, Ningbo, Qingdao, Shenzhen, and Suzhou |
| July 24, 2018 | Beijing, Hohhot, Shenyang, Changchun, Harbin, Nanjing, Nanchang, Wuhan, Changsha, Nanning, Haikou, Guiyang, Kunming, Xi’an, Lanzhou, Xiamen, Tangshan, Wuxi, Weihai, Zhuhai, Dongguan, and Yiwu |
| December 15, 2019 | Shijiazhuang, Taiyuan, Chifeng, Fushun, Hunchun, Suifenhe, Xuzhou, Nantong, Wenzhou, Shaoxing, Wuhu, Fuzhou, Quanzhou, Ganzhou, Jinan, Yantai, Luoyang, Huangshi, Yueyang, Shantou, Foshan, Luzhou, Haidong, and Yinchuan |
| April 27, 2020 | Xiong’an New Area, Datong, Manzhouli, Yingkou, Panjin, Jilin, Heihe, Changzhou, Lianyungang, Huai’an, Yancheng, Suqian, Huzhou, Jiaxing, Quzhou, Taizhou (Zhejiang), Lishui, Anqing, Zhangzhou, Putian, Longyan, Jiujiang, Dongying, Weifang, Linyi, Nanyang, Yichang, Xiangtan, Chenzhou, Meizhou, Huizhou, Zhongshan, Jiangmen, Zhanjiang, Maoming, Zhaoqing, Chongzuo, Sanya, Deyang, Mianyang, Zunyi, Dehong Dai and Jingpo Autonomous Prefecture, Yan’an, Tianshui, Xining, and Ürümqi |
| January 22, 2022 | Ordos, Yangzhou, Zhenjiang, Taizhou (Jiangsu), Jinhua, Zhoushan, Ma’anshan, Xuancheng, Jingdezhen, Shangrao, Zibo, Rizhao, Xiangyang, Shaoguan, Shanwei, Heyuan, Yangjiang, Qingyuan, Chaozhou, Jieyang, Yunfu, Nanchong, Meishan, Honghe Hani and Yi Autonomous Prefecture, Baoji, Kashgar, and Alashankou |
